## ANESTHESIOLOGY

# Succinylcholine Use and Dantrolene Availability for Malignant Hyperthermia Treatment

## Database Analyses and Systematic Review

Marilyn Green Larach, M.D., F.A.A.P., Thomas T. Klumpner, M.D., Barbara W. Bandom, M.D., Michelle T. Vaughn, M.P.H., Kumar G. Belani, M.B.B.S., M.S., F.A.A.P., Andrew Herlich, D.M.D., M.D., F.A.A.P., F.A.S.A., Tae W. Kim, M.D., M.E.H.P., Janine Limoncelli, M.D., Sheila Riaz, M.Sc., M.D., FRCPC, Erica L. Sivak, M.D., John Capacchione, M.D., Darlene Mashman, M.D., Sachin Kheterpal, M.D., M.B.A., on behalf of the Multicenter Perioperative Outcomes Group\*

*ANESTHESIOLOGY* 2019; 130:41–54

Malignant hyperthermia (MH) events are uncommon but potentially lethal adverse responses to volatile anesthetic agents or succinylcholine. Some question whether succinylcholine without volatile anesthetics triggers MH.<sup>1</sup> Dantrolene is an effective antidote.<sup>2,3</sup> Health Canada (Ottawa, Ontario) and the U.S. Food and Drug Administration (Silver Spring, Maryland) approved iv dantrolene for MH treatment in 1974 and 1979, respectively.<sup>4</sup>

Malignant Hyperthermia Association of the United States (MHAUS; Sherburne, New York) guidelines state that dantrolene must be available within 10 min of the decision to treat MH at all anesthetizing/sedating locations where MH-triggering agents are used.<sup>5</sup> MHAUS recommends an initial 2.5-mg/kg dantrolene dose repeated until adequate response is achieved.<sup>6</sup> MHAUS mandates that each institution stock at least 720 mg of dantrolene—sufficient to administer 10 mg/kg to a 70-kg patient.

In 2014, the American Association for Accreditation of Ambulatory Surgery Facilities (Gurnee, Illinois) created a “protocol to manage the possibility of malignant hyperthermia following its (succinylcholine) use.” Dantrolene was required only if Class C-M/C facilities stocked volatile anesthetic agents. (Class C-M facilities may administer deep sedation, field/peripheral nerve blocks, spinal, and epidural anesthesia. Class C facilities have no anesthetic restrictions.)<sup>7</sup>

In 2017, the Society for Ambulatory Anesthesia (Chicago, Illinois) published a protocol for Class B ambulatory

## ABSTRACT

**Background:** Although dantrolene effectively treats malignant hyperthermia (MH), discrepant recommendations exist concerning dantrolene availability. Whereas Malignant Hyperthermia Association of the United States guidelines state dantrolene must be available within 10 min of the decision to treat MH wherever volatile anesthetics or succinylcholine are administered, a Society for Ambulatory Anesthesia protocol permits Class B ambulatory facilities to stock succinylcholine for airway rescue without dantrolene. The authors investigated (1) succinylcholine use rates, including for airway rescue, in anesthetizing/sedating locations; (2) whether succinylcholine without volatile anesthetics triggers MH warranting dantrolene; and (3) the relationship between dantrolene administration and MH morbidity/mortality.

**Methods:** The authors performed focused analyses of the Multicenter Perioperative Outcomes Group (2005 through 2016), North American MH Registry (2013 through 2016), and Anesthesia Closed Claims Project (1970 through 2014) databases, as well as a systematic literature review (1987 through 2017). The authors used difficult mask ventilation (grades III and IV) as a surrogate for airway rescue. MH experts judged dantrolene treatment. For MH morbidity/mortality analyses, the authors included U.S. and Canadian cases that were fulminant or scored 20 or higher on the clinical grading scale and in which volatile anesthetics or succinylcholine were given.

**Results:** Among 6,368,356 queried outcomes cases, 246,904 (3.9%) received succinylcholine without volatile agents. Succinylcholine was used in 46% (n = 710) of grade IV mask ventilation cases (median dose, 100 mg, 1.2 mg/kg). Succinylcholine without volatile anesthetics triggered 24 MH cases, 13 requiring dantrolene. Among 310 anesthetic-triggered MH cases, morbidity was 20 to 37%. Treatment delay increased complications every 10 min, reaching 100% with a 50-min delay. Overall mortality was 1 to 10%; 15 U.S. patients died, including 4 after anesthetics in freestanding facilities.

**Conclusions:** Providers use succinylcholine commonly, including during difficult mask ventilation. Succinylcholine administered without volatile anesthetics may trigger MH events requiring dantrolene. Delayed dantrolene treatment increases the likelihood of MH complications. The data reported herein support stocking dantrolene wherever succinylcholine or volatile anesthetics may be used.

(Anesthesiology 2019; 130:41–54)

## EDITOR'S PERSPECTIVE

### What We Already Know about This Topic

- Dantrolene effectively treats malignant hyperthermia, but there are discrepant recommendations for dantrolene availability in facilities that stock succinylcholine for airway rescue but do not use volatile anesthetics.

### What This Article Tells Us That Is New

- The authors performed an analysis of data from three databases and a systematic literature review.
- Providers frequently use succinylcholine, including during difficult mask ventilation.
- Succinylcholine given without volatile anesthetics triggered 24 malignant hyperthermia events, 13 of which were treated with dantrolene. Fourteen patients experienced substantial complications, and one died.
- Delayed dantrolene treatment worsened patient outcomes.

facilities that choose to not stock dantrolene and use “low-dose” succinylcholine for emergency airway rescue. (Class B facilities allow minimally or moderately invasive surgery with oral, parenteral, iv sedation, and/or analgesic or dissociative drugs.) The protocol states MH-susceptible individuals should not receive care in these facilities; providers should be “familiar with the early recognition and management of MH crisis,” “conduct annual MH drills,” and have an “agreement with the closest health care center carrying dantrolene.”<sup>8</sup>

Along with MHAUS, the American Association for Accreditation of Ambulatory Surgery Facilities and the Society for Ambulatory Anesthesia emphasize MH preoperative screening to decrease MH events. However, the North American Malignant Hyperthermia Registry of MHAUS (Gainesville, Florida) studies show that taking a personal or family history will not prevent all MH cases. For 152 MH patients, the median number of unremarkable prior general anesthetics was 2 (first quartile, 1; third quartile, 2; range, 0 to 30). Further, 7.2% (24/332) of positive family histories were discovered after anesthetics triggered MH events. Three of these 24 patients died.<sup>9,10</sup> Finally, limited U.S./Canadian testing interferes with MH identification.<sup>11</sup>

In contrast to Society for Ambulatory Anesthesia recommendations, the Institute for Safety in Office-Based Surgery (Boston, Massachusetts) checklists state “36 vials of dantrolene sodium must be available wherever MH triggering agents are used.”<sup>12</sup> Ontario, Massachusetts, and Tennessee mandate availability of succinylcholine for airway rescue and dantrolene to treat possible succinylcholine-induced MH.<sup>13–15</sup>

Given the discrepant guidance for MH preparation, we utilized targeted queries of three databases: (1) the

Multicenter Perioperative Outcomes Group (Ann Arbor, Michigan) database of sedations/anesthetics administered in many institutions across multiple locations, (2) the North American Malignant Hyperthermia Registry, containing detailed MH event information, and (3) the Anesthesia Closed Claims Project (Seattle, Washington) of adverse anesthetic outcomes, paired with a systematic literature review to investigate three questions. What is the succinylcholine use rate, including for airway rescue, in various anesthetizing/sedating locations? Does succinylcholine without volatile anesthetics trigger MH including cases warranting dantrolene, and are these associated with morbidity/mortality? What is the relationship between dantrolene administration (time/dose) and U.S./Canadian MH morbidity/mortality rates?

## Materials and Methods

### Database Search Strategy

The Multicenter Perioperative Outcomes Group database was queried for frequency of succinylcholine use, including airway rescue, in various anesthetizing/sedating locations. The Multicenter Perioperative Outcomes Group’s database includes observational electronic medical records data submitted by anesthesiology departments from an international medical center consortium. It does not include Canadian institutions, has few office-based locations, and does not include data from sedations/anesthetics administered without anesthesiology involvement.<sup>16,17</sup>

After Institutional Review Board (University of Michigan, Ann Arbor, Michigan) approval, we queried the Multicenter Perioperative Outcomes Group database for all patients receiving an anesthetic from January 1, 2005 through December 31, 2016. Anesthetics included monitored anesthesia care, neuraxial, regional block, and/or general anesthetics. We excluded anesthetic records with ambiguously defined or erroneously assigned locations, and locations with small sample sizes that would affect generalizability (e.g., office-based locations). We grouped some locations (see Supplemental Digital Content 1 for Multicenter Perioperative Outcomes Group location classifications lists, <http://links.lww.com/ALN/B798>).

We calculated succinylcholine utilization, with and without volatile anesthetic administration, across various anesthetizing locations. We defined succinylcholine administration as succinylcholine dose greater than 0 and volatile anesthetic administration as expired desflurane, isoflurane, or sevoflurane values greater than 0.

A subgroup analysis evaluated anesthetics with difficult mask ventilation. A study author (T.T.K.) manually reviewed airway mask ventilation notes and categorized difficulty of mask ventilation based on established groupings.<sup>18</sup> We excluded cases without clear mask ventilation

Corresponding article on page 6. Supplemental Digital Content is available for this article. Direct URL citations appear in the printed text and are available in both the HTML and PDF versions of this article. Links to the digital files are provided in the HTML text of this article on the Journal’s Web site ([www.anesthesiology.org](http://www.anesthesiology.org)).

Submitted for publication May 19, 2018. Accepted for publication September 21, 2018. From The North American Malignant Hyperthermia Registry of the Malignant Hyperthermia Association of the United States, University of Pittsburgh Medical Center, Mercy Hospital, Pittsburgh, Pennsylvania (2000 through 2017; M.G.L., B.W.B.); Department of Anesthesiology, University of Florida College of Medicine, Gainesville, Florida (2018; M.G.L.); Department of Anesthesiology, University of Michigan Medical School, Ann Arbor, Michigan (T.T.K., M.T.V., S.K.); Department of Nurse Anesthesia, University of Pittsburgh, Pittsburgh, Pennsylvania (2016 through 2018; B.W.B.); Department of Anesthesiology, School of Medicine (K.G.B., T.W.K., J.C.) and School of Public Health (K.G.B.), University of Minnesota, Minneapolis, Minnesota; Department of Anesthesiology, Children’s Hospital of Pittsburgh (E.L.S.), and Department of Anesthesiology (A.H.), University of Pittsburgh Medical Center, Pittsburgh, Pennsylvania; Department of Anesthesiology, Weill Cornell Medical College and New York–Presbyterian Hospital, New York, New York (J.L.); Department of Anesthesia and Pain Management, University Health Network, University of Toronto, Toronto, Canada (S.R.); Department of Anesthesiology and Pediatrics, Emory University School of Medicine, and Children’s Healthcare of Atlanta, Egleston Hospital, Atlanta, Georgia (D.M.). Current positions: Dr. Larach is now at the Department of Anesthesiology, University of Florida, Gainesville, Florida. Dr. Sivak is now at the Department of Anesthesiology and Pain Medicine, Nationwide Children’s Hospital and The Ohio State University, Columbus, Ohio.

\*Members of the Multicenter Perioperative Outcomes Group are listed in appendix 1.

documentation from subgroup analysis. For cases with two different grades, we assigned the more severe grade. We determined succinylcholine use among cases with grade I/II difficulty, grade III/IV difficulty, and grade IV difficulty alone. We did not analyze whether succinylcholine was given before or after documentation of mask ventilation difficulty. A subgroup analysis of grade IV mask ventilation cases analyzed succinylcholine dosage. Another subgroup analysis compared frequency of succinylcholine use during grade IV mask ventilation among pediatric patients ages 0 to under 10 yr and 10 to under 18 yr.

The Anesthesia Closed Claims Project database consists of 11,035 cases from closed malpractice claims of participating malpractice insurance organizations with standardized evaluation of adverse anesthetic outcomes. This database was searched for cases from 1970 through 2014 in which succinylcholine without volatile anesthetic agents triggered an MH event.

The North American Malignant Hyperthermia Registry database contains more than 900 AMRA (Adverse Metabolic/Musculoskeletal Reactions to Anesthesia) forms submitted voluntarily by healthcare professionals. After Institutional Review Board (University of Pittsburgh, Pittsburgh, Pennsylvania) approval, the AMRA database was searched for reports submitted from 2013 through 2016 of (1) succinylcholine without volatile anesthetics agents triggering an MH event and (2) death associated with an MH event.

We searched North American Malignant Hyperthermia Registry and Anesthesia Closed Claims Project databases for relevant unpublished MH event data using the following criteria.

Inclusion criteria were human, MH triggered by volatile anesthetic agents or succinylcholine with severity graded as “somewhat greater than likely,” “very likely,” or “almost certain” (greater than or equal to 20) on the MH clinical grading scale or event judged “fulminant” by a clinician.<sup>19</sup> We limited morbidity/mortality rates to those calculated for U.S./Canadian acute event hospitalizations.

Exclusion criteria were nonhuman, events with severity graded as “almost never,” “unlikely,” or “somewhat less than likely” (less than 20) by the MH clinical grading scale or not “fulminant” as reported by a clinician, MH not triggered by the administration of volatile anesthetic agents/succinylcholine (e.g., “awake” or “stress-induced” MH), and postdischarge and non-U.S./Canadian MH morbidity/mortality rates.

For database and literature searches, MH experts (M.G.L., B.W.B., S.R.) judged whether dantrolene treatment was warranted in succinylcholine without volatile anesthetic MH cases.

## Literature Search Strategy

We prospectively registered our systematic review protocol with PROSPERO, International prospective register of

systematic review, (York, United Kingdom) on April 30, 2017 (CRD42017064696) with a final revision approved on October 30, 2018. We used 11 queries to evaluate evidence concerning dantrolene availability for MH treatment in various anesthetizing/sedating locations (see appendix 2 for full text of each query).

We searched PubMed, EMBASE, and Cochrane Library databases for human studies including qualitative studies and case reports published in English or with an English abstract from January 1, 1969, through at least December 31, 2017. For selected queries, OVID, MEDLINE, Westlaw, and Google databases were also searched (see appendix 2 for key words/combinations). Our inclusion and exclusion criteria were identical to those listed above for the North American Malignant Hyperthermia Registry and Closed Claims Project queries.

We repeated literature searches before final analyses and retrieved 13 additional studies. Each query author prepared a Preferred Reporting Items for Systematic Reviews and Meta-analyses (PRISMA) flow diagram, contacted principal authors for relevant unreported data, and created an evidence table summarizing relevant literature with Oxford Center for Evidence-based Medicine level and Cochrane Collaboration Tool bias assessment.<sup>20–22</sup> At least one additional author reviewed bias evaluations. We circulated evidence tables to all authors to elicit feedback.

## Data Synthesis

For Multicenter Perioperative Outcomes Group data analysis, we summarized descriptive statistics including frequencies, percentages, and 95% CI. For the pediatric subgroup airway analysis, a two-sided Fisher exact chi-square test compared percentages across two age groups with a *P* value of less than 0.05 considered significant. We performed all analyses using SAS version 9.4 (SAS Institute, Cary, North Carolina). For North American Malignant Hyperthermia Registry data analysis, we summarized descriptive statistics.

For the literature search, we prepared a narrative synthesis for included studies. A summary PRISMA flow diagram was created. We compiled individual query PRISMA flow diagrams and tables. We combined individual query results to answer the three study questions.

## Results

We identified 6,938,341 sedative/anesthetic cases in the Multicenter Perioperative Outcomes Group database. Of these, 6,368,356 had valid sedative/anesthetic locations, with 95.7% occurring in U.S. institutions. Location and degree of mask ventilation difficulty (grades I through IV) was documented for 1,611,740 cases; 710 had grade IV mask ventilation and succinylcholine dose in milligrams recorded. Weight was available for 560 of these 710 cases

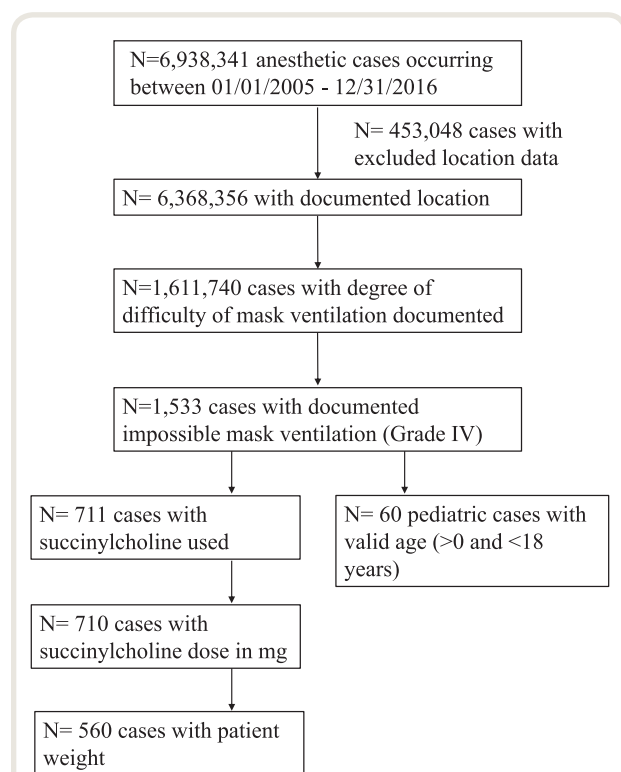

**Fig. 1.** This flow diagram depicts our examination of the Multicenter Perioperative Outcomes Group database. We identified 6,938,341 sedative/anesthetic cases. Of these, 6,368,356 had a valid sedative/anesthetic location. For 1,611,740 cases, a location and degree of mask ventilation difficulty (grades I through IV) were documented. We identified 711 cases with grade IV mask ventilation documented and a recorded use of succinylcholine; 710 of these cases had the dose of succinylcholine recorded in milligrams. In 560 of these grade IV mask ventilation cases where a dose in milligrams of succinylcholine was provided, weight was available, permitting a milligrams per kilogram succinylcholine dose calculation. We also identified 60 pediatric cases with documented location, age, and grade IV mask ventilation.

permitting milligrams per kilogram succinylcholine dose calculation. We identified 60 pediatric cases with documented location, age, and grade IV mask ventilation (fig. 1).

We identified 91 AMRA reports in the North American Malignant Hyperthermia Registry from 2013 through 2016; 75 met inclusion criteria. Thirty MH cases were identified in the Anesthesia Closed Claims Project database; one met inclusion criteria.

We examined PubMed, Cochrane, EMBASE, OVID, MEDLINE, Google, and Westlaw databases, and identified 20,830 articles for possible inclusion. We screened 2,240 abstracts, reviewed 1,078 full-text manuscripts, and qualitatively synthesized 55 unique study results (fig. 2).

For our three primary questions, the results are as follows.

## 1. What Is the Succinylcholine Use Rate, Including for Airway Rescue, in Various Anesthetizing/Sedating Locations?

### 1a. Hospital-based Operating Suites (Including Delivery Suites), Intensive Care Units, and Emergency Departments Multicenter Perioperative Outcomes Group Database Search.

In hospital-based operating rooms, 20.2% ( $n = 859,294$ ) of anesthetics included succinylcholine, and 4.7% ( $n = 201,347$ ) included succinylcholine without volatile anesthetics. Among pediatric hospital-based operating rooms, 5.8% ( $n = 31,100$ ) of anesthetics included succinylcholine, and 0.6% ( $n = 3,343$ ) included succinylcholine without volatile agents. For obstetrics operating rooms, 7.5% ( $n = 7,894$ ) of all anesthetics included succinylcholine, while 2.1% ( $n = 2,167$ ) included succinylcholine in the absence of volatile anesthetics (table 1). The Multicenter Perioperative Outcomes Group database did not have sufficient location data to support an analysis of delivery suites, intensive care units, or emergency departments.

**Literature Search.** The succinylcholine administration rate varied between 0.7 and 94.3%. The highest succinylcholine use rate was reported in a 42-month prospective observational cohort of airway management in a tertiary care hospital emergency department.<sup>23</sup> Three studies reported succinylcholine administration in the operating room as part of airway management during general anesthesia.<sup>24–26</sup> Five studies performed in the emergency department, one in the pediatric intensive care unit, and one in the neonatal intensive care unit reported succinylcholine administration to facilitate endotracheal intubation. No studies examined obstetrics patients. Studies were designed to determine which drug facilitated endotracheal intubation. Therefore, cohorts reported were a small part of the entire population of hospitalized patients; no estimate of the overall succinylcholine administration rate per patient per unit of time could be made (Supplemental Digital Content 2, <http://links.lww.com/ALN/B799>).<sup>27–34</sup>

### 1b. Procedural Suites (Radiology, Electroconvulsive Therapy) Multicenter Perioperative Outcomes Group Database Search.

In acute care remote locations, 14.1% ( $n = 66,782$ ) of all anesthetics included succinylcholine. Succinylcholine was used without volatile agents in 5.6% ( $n = 26,561$ ) of cases. For pediatric hospital acute care remote locations, the frequency of succinylcholine use was 2.3% ( $n = 1,402$ ); succinylcholine without volatile anesthetics was administered in 0.1% ( $n = 74$ ) of cases (table 1). The Multicenter Perioperative Outcomes Group does not define how many of these acute care remote locations are in radiology suites or electroconvulsive therapy rooms.

**Literature Search.** No publications addressed this issue.



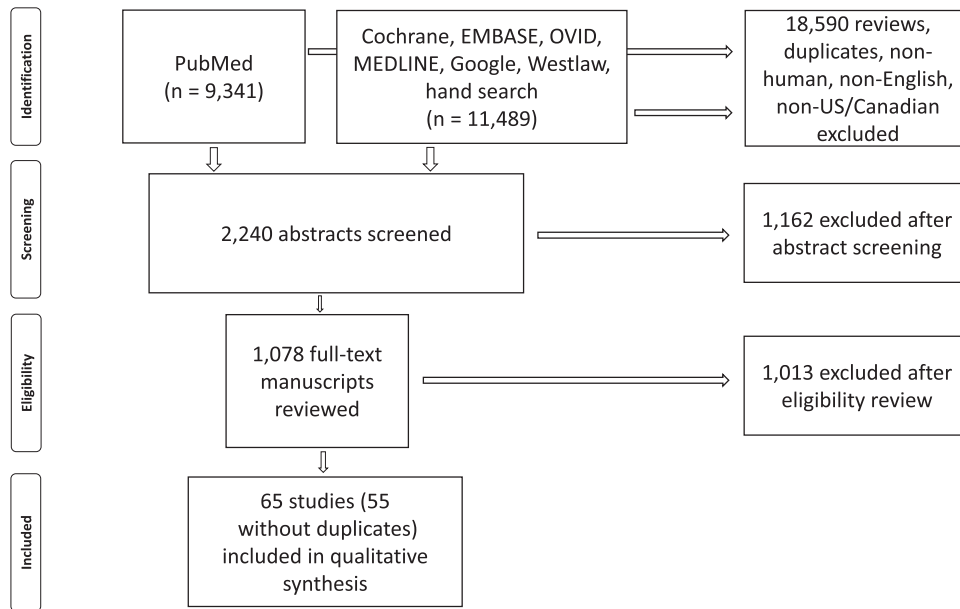

**Fig. 2.** This Preferred Reporting Items for Systematic Reviews and Meta-analyses (PRISMA) figure for systematic literature search depicts summary statistics for our 11 queries. We examined PubMed, Cochrane, EMBASE, OVID, MEDLINE, Google, and Westlaw databases, and identified 20,830 articles for possible inclusion. We excluded 18,590 reviews, duplicate publications, nonhuman studies, studies lacking English abstracts, and for malignant hyperthermia morbidity and mortality queries, non-U.S. or Canadian studies. We screened 2,240 abstracts. After exclusion of 1,162 additional studies, we reviewed 1,078 full-text manuscripts. After eligibility review, an additional 1,013 studies were excluded. A total of 65 studies was analyzed. After 10 duplicates among queries were excluded, we performed a qualitative synthesis of 55 unique study results.

### 1c. Ambulatory Surgery Centers

#### Multicenter Perioperative Outcomes Group Database Search.

For ambulatory surgery centers attached to hospitals, succinylcholine use frequency was 12.5% ( $n = 39,049$ ). Succinylcholine without volatile anesthetics was used in 2.4% ( $n = 7,535$ ) of cases. For freestanding ambulatory surgery centers, succinylcholine use frequency was 4.8% ( $n = 29,892$ ); 0.9% ( $n = 5,877$ ) of cases involved succinylcholine without volatile anesthetics (table 1).

**Literature Search.** No studies specifically addressed succinylcholine administration rate in ambulatory surgery centers. However, six studies compared succinylcholine ( $n = 202$  subjects) with other agents with respect to intubating conditions, myalgias, and effectiveness, thereby implying succinylcholine is used in ambulatory surgery centers (Supplemental Digital Content 3, <http://links.lww.com/ALN/B800>).<sup>35–40</sup>

### 1d. Medical, Oral Surgery, and Dental Offices

**Literature Search.** One unblinded prospective Norwegian single-site 5-yr study measured laryngospasm treatment with succinylcholine in healthy pediatric patients anesthetized by a dedicated anesthetic team using total iv anesthesia with laryngeal mask airway for adenotonsillectomy. They found 10 of 1,126 patients experienced less than 90% oxygen saturation measured by pulse oximetry attributable to laryngospasm, and 9 of 1,126 (0.8%) required

succinylcholine. No patient developed MH (Supplemental Digital Content 4, <http://links.lww.com/ALN/B801>).<sup>41</sup>

### 1e. Airway Rescue

#### Multicenter Perioperative Outcomes Group Database Search.

Among the 59,762 patients of any age found to have grade III/IV difficult mask ventilation, the frequency of succinylcholine use was 33.8% ( $n = 20,175$ ). In attached and free ambulatory surgery centers, the frequency of succinylcholine use with grade III/IV difficult mask ventilation was 32.9% ( $n = 701$ ) and 36.7% ( $n = 509$ ), respectively. For the 1,533 grade IV mask ventilation cases, frequency of succinylcholine use was 46.4% ( $n = 711$ ; table 2). Among the 710 grade IV mask ventilation cases with a recorded milligrams of succinylcholine amount, the median dose was 100 mg (first quartile, 100; third quartile, 140; range, 10 to 320 mg). For the 560 grade IV mask ventilation cases with a recorded succinylcholine amount and weight, the dose was 1.2 mg/kg (first quartile, 0.97; third quartile, 1.44; range, 0.12 to 3.02 mg/kg). For the 60 pediatric patients (age less than 18 yr) with a grade IV mask, succinylcholine use frequency was 25% ( $n = 15$ ). There was no difference in succinylcholine use between those aged 0 to 10 yr and those aged 10 to 18 yr ( $P = 0.12$ ).

**Literature Search.** Eighteen studies reported succinylcholine use in 0.02 to 90% of individuals requiring “airway rescue” for predominantly laryngospasm. A large U.S. retrospective

**Table 1.** Frequency of Succinylcholine Use with and without Volatile Agents\* during Sedations or Anesthetics† by Location

| Location<br>No. of Reporting Institutions‡                 | Cases with<br>Succinylcholine<br>and Volatile Agent<br>Administration<br>N<br>% (95% CI) | Cases with<br>Succinylcholine<br>and without Volatile Agent<br>Administration<br>N<br>% (95% CI) | Cases with<br>Succinylcholine<br>Administration<br>N<br>% (95% CI) | All Cases<br>N<br>% (95% CI)  |
|------------------------------------------------------------|------------------------------------------------------------------------------------------|--------------------------------------------------------------------------------------------------|--------------------------------------------------------------------|-------------------------------|
| Acute care hospital main OR<br>N = 38 institutions         | 657,947<br>15.5 (15.4–15.5)                                                              | 201,347<br>4.7 (4.7–4.8)                                                                         | 859,294<br>20.2 (20.2–20.3)                                        | 4,250,831<br>65.6 (65.5–65.6) |
| Acute care hospital remote location<br>N = 29 institutions | 40,221<br>8.5 (8.4–8.5)                                                                  | 26,561<br>5.6 (5.5–5.7)                                                                          | 66,782<br>14.1 (14.0–14.1)                                         | 475,483<br>7.3 (7.3–7.4)      |
| Pediatric hospital main<br>N = 10 institutions             | 27,757<br>5.2 (5.1–5.2)                                                                  | 3,343<br>0.6 (0.6–0.6)                                                                           | 31,100<br>5.8 (5.7–5.9)                                            | 536,780<br>8.3 (8.3–8.3)      |
| Pediatric hospital remote location<br>N = 7 institutions   | 1,328<br>2.2 (2.1–2.3)                                                                   | 74<br>0.1 (0.1–0.2)                                                                              | 1,402<br>2.3 (2.2–2.4)                                             | 61,451<br>1.0 (0.9–1.0)       |
| ASC attached<br>N = 15 institutions                        | 31,514<br>10.0 (9.9–10.2)                                                                | 7,535<br>2.4 (2.4–2.5)                                                                           | 39,049<br>12.5 (12.3–12.6)                                         | 313,743<br>4.8 (4.8–4.9)      |
| ASC free<br>N = 24 institutions                            | 24,015<br>3.8 (3.8–3.9)                                                                  | 5,877<br>0.9 (0.9–1.0)                                                                           | 29,892<br>4.8 (4.7–4.8)                                            | 624,750<br>9.6 (9.6–9.7)      |
| Obstetrics OR<br>N = 22 institutions                       | 5,727<br>5.4 (5.3–5.6)                                                                   | 2,167<br>2.1 (2.0–2.2)                                                                           | 7,894<br>7.5 (7.3–7.7)                                             | 105,318<br>1.6 (1.6–1.6)      |
| All locations<br>N = 40 institutions                       | 788,509<br>12.4 (12.4–12.4)                                                              | 246,904<br>3.9 (3.9–3.9)                                                                         | 1,035,413<br>16.3 (16.2–16.3)                                      | 6,368,356                     |

\*Volatile agent defined by any nonzero value for expired desflurane, isoflurane, or sevoflurane. †Anesthetics include monitored anesthesia care, neuraxial, regional block, or general anesthetics. ‡A single institution may be reporting data from more than one physical entity, e.g., a single institution may include more than one acute care hospital, remote location, obstetrics unit, or ASC.

ASC, ambulatory surgical center; free, freestanding; OR, operating room.

quality improvement study in a single institution examined 21,452 pediatric cases in which 21 laryngospasm episodes were reported; 38% (n = 8) required succinylcholine.<sup>42</sup> An Australian Incident Monitoring Study examined 189 laryngospasm events; 15% (n = 29) required succinylcholine.<sup>43</sup> Most studies demonstrated reporting bias with possible underreporting. Seven studies reported succinylcholine doses that varied significantly: 0.1 mg/kg (n = 2),<sup>44</sup> 0.25 mg/kg (n = 1),<sup>45</sup> 0.5 mg/kg (n = 45),<sup>46,47</sup> and 1 mg/kg (n = 8).<sup>48–50</sup> Studies were Oxford Center for Evidence-based Medicine levels 2 through 4 (Supplemental Digital Content 5, <http://links.lww.com/ALN/B802>).<sup>41,44,48,51–58</sup>

## 2. Does Administration of Succinylcholine without Concomitant Volatile Anesthetic Administration Trigger MH Including Cases Warranting Dantrolene, and Are These Associated with Morbidity/Mortality?

**North American Malignant Hyperthermia Registry Database Search.** Two MH events after succinylcholine without volatile anesthetic administration were reported in U.S. hospitals. Both cases received dantrolene warranted by clinical circumstances, although administration times were unclear. Both patients experienced MH morbidity (decreased level of consciousness) but survived.

**Anesthesia Closed Claims Database Search.** One fatal MH event followed administration of multiple doses of

succinylcholine without volatile anesthetic administration in a U.S. hospital in 1984. Dantrolene was warranted and administered, but the time of administration was unknown.

**Literature Search.** The literature reported 21 MH events after the administration of succinylcholine without exposure to volatile anesthetic agents, 18 in the United States or Canada.<sup>27,59–63</sup> These cases did not overlap with the two North American Malignant Hyperthermia Registry events. Succinylcholine doses were 0.5 to 2.5 mg/kg (n = 12).<sup>27</sup> Ten cases received dantrolene. Its use was clinically indicated in all cases, although administration times were not well documented. MH morbidities in 12 cases included rhabdomyolysis, change in consciousness level, life-threatening arrhythmias, and renal dysfunction/failure. All articles have reporting bias attributable to selective reporting. See Supplemental Digital Content 6, <http://links.lww.com/ALN/B803>.

## 3. What Is the Relationship between Dantrolene Administration and MH Morbidity and Mortality Rates in the United States and Canada?

### 3a. MH Morbidity

#### Literature Search.

**Description.** MH morbidities included cardiac dysfunction including cardiac arrest, renal dysfunction, consciousness level change/coma, pulmonary edema, disseminated intravascular coagulation, and hepatic dysfunction. Other

**Table 2.** Frequency of Succinylcholine Use\* during Graded Mask Ventilation

| Location                    | No. of Reporting Institutions† | Succinylcholine Use in Any Case with Grade I or II |            | Succinylcholine Use in Any Case with Grade III or IV |            | Succinylcholine Use in Any Case with Grade IV |            | Succinylcholine Use with All Grades |            | Cases with Documented Grade I or II |            | Cases with Documented Grade III or IV |            | Cases with Documented Grade IV |            | Cases with Documented Grade N |            |
|-----------------------------|--------------------------------|----------------------------------------------------|------------|------------------------------------------------------|------------|-----------------------------------------------|------------|-------------------------------------|------------|-------------------------------------|------------|---------------------------------------|------------|--------------------------------|------------|-------------------------------|------------|
|                             |                                | N                                                  | % (95% CI) | N                                                    | % (95% CI) | N                                             | % (95% CI) | N                                   | % (95% CI) | N                                   | % (95% CI) | N                                     | % (95% CI) | N                              | % (95% CI) | N                             | % (95% CI) |
| Acute care hospital main OR |                                | 259,290                                            |            | 17,578                                               |            | 611                                           |            | 276,868                             |            | 1,120,202                           |            | 52,320                                |            | 1,272                          |            | 1,172,522                     |            |
| N = 20 institutions         |                                | 23.1 (23.1–23.2)                                   |            | 33.6 (33.2–34.0)                                     |            | 48.0 (45.3–50.8)                              |            | 23.6 (23.5–23.7)                    |            | 84,728                              |            | 2,641                                 |            | 68                             |            | 87,369                        |            |
| Acute care hospital remote  |                                | 35,641                                             |            | 1,162                                                |            | 32                                            |            | 36,803                              |            | 159,312                             |            | 1,090                                 |            | 32                             |            | 160,402                       |            |
| N = 15 institutions         |                                | 42.1 (41.7–42.4)                                   |            | 44.0 (42.1–45.9)                                     |            | 47.1 (34.8–59.6)                              |            | 42.1 (41.8–42.5)                    |            | 24,717                              |            | 158                                   |            | 6                              |            | 24,875                        |            |
| Pediatric hospital main     |                                | 6,330                                              |            | 177                                                  |            | 6                                             |            | 6,507                               |            | 74,666                              |            | 2,130                                 |            | 116                            |            | 76,796                        |            |
| N = 6 institutions          |                                | 4.0 (3.9–4.1)                                      |            | 16.2 (14.1–18.6)                                     |            | 18.8 (7.2–36.4)                               |            | 4.1 (4.0–4.2)                       |            | 87,221                              |            | 1,388                                 |            | 34                             |            | 88,609                        |            |
| Pediatric hospital remote   |                                | 547                                                |            | 20                                                   |            | 1                                             |            | 567                                 |            | 1,132                               |            | 35                                    |            | 5                              |            | 1,167                         |            |
| N = 4 institutions          |                                | 2.2 (2.0–2.4)                                      |            | 12.7 (7.9–18.9)                                      |            | 16.7 (0.4–64.1)                               |            | 2.3 (2.1–2.5)                       |            | 1,551,978                           |            | 59,762                                |            | 1,533                          |            | 1,611,740                     |            |
| ASC attached                |                                | 12,577                                             |            | 701                                                  |            | 38                                            |            | 13,278                              |            |                                     |            |                                       |            |                                |            |                               |            |
| N = 9 institutions          |                                | 16.8 (16.6–17.1)                                   |            | 32.9 (30.9–35.0)                                     |            | 32.8 (24.3–42.1)                              |            | 17.3 (17.0–17.6)                    |            |                                     |            |                                       |            |                                |            |                               |            |
| ASC free                    |                                | 10,541                                             |            | 509                                                  |            | 19                                            |            | 11,050                              |            |                                     |            |                                       |            |                                |            |                               |            |
| N = 14 institutions         |                                | 12.1 (11.9–12.3)                                   |            | 36.7 (34.1–39.3)                                     |            | 55.9 (37.9–72.8)                              |            | 12.5 (12.3–12.7)                    |            |                                     |            |                                       |            |                                |            |                               |            |
| Obstetrics OR               |                                | 763                                                |            | 28                                                   |            | 4                                             |            | 791                                 |            |                                     |            |                                       |            |                                |            |                               |            |
| N = 14 institutions         |                                | 67.4 (64.6–70.1)                                   |            | 80.0 (63.1–91.6)                                     |            | 80.0 (28.4–99.5)                              |            | 67.8 (65.0–70.5)                    |            |                                     |            |                                       |            |                                |            |                               |            |
| All locations               |                                | 325,689                                            |            | 20,175                                               |            | 711                                           |            | 345,864                             |            |                                     |            |                                       |            |                                |            |                               |            |
| N = 20 institutions         |                                | 21.0 (20.9–21.0)                                   |            | 33.8 (33.4–34.1)                                     |            | 46.4 (43.9–48.9)                              |            | 21.5 (21.4–21.5)                    |            |                                     |            |                                       |            |                                |            |                               |            |

\*Succinylcholine could have been administered at any point at any dose during the anesthetic. †A single institution may be reporting data from more than one physical entity; e.g., a single institution may include more than one acute care hospital, remote location, obstetrics unit, or ASC.

ASC, ambulatory surgical center; free, freestanding; OR, operating room.

complications included compartment syndrome and pleural effusion. Some may consider MH recrudescence as a morbidity.<sup>9</sup>

**Rates.** Complications not including recrudescence, cardiac arrest, or death occurred in 20 to 37% of 310 MH events. These rates were consistent across two nonoverlapping databases (North American Malignant Hyperthermia Registry and Toronto General MH Database). Overall, as MH event severity increased, morbidity rate increased.<sup>9,10,27</sup> The MH recrudescence rate was estimated to be 20%.<sup>64</sup>

**Relationship to Dantrolene (Dose and Time).** In the largest retrospective MH morbidity study, there was inadequate power to detect differences between the group receiving dantrolene and the one not receiving dantrolene.<sup>9</sup> Initial dantrolene dose was not significant in a model analyzing likelihood of complications (odds ratio, 1.13; 95% CI, 0.96 to 1.33;  $P = 1.000$ ). For the group not experiencing complications, median initial dantrolene dose was 2.31 (95% CI, 1.47 to 2.67) mg/kg and for the group experiencing complications, median initial dose of dantrolene was 2.48 (95% CI, 2.00 to 2.89) mg/kg. However, the likelihood of an MH complication increased 1.61 (95% CI, 1.16 to 2.25) times for every 30-min increase in time between first MH sign and first dantrolene dose.<sup>9</sup> Complications increased with increasing minutes to dantrolene use from the first MH sign. Complications increased substantially for each 10-min delay in dantrolene administration. Complication rates increased to 100% when dantrolene was delayed beyond 50 min.<sup>27</sup> Studies were all Oxford Center for Evidence-based Medicine level 3 or 4 and may have been limited by possible selection bias, reporting, and recall bias (Supplemental Digital Content 7, <http://links.lww.com/ALN/B804>).<sup>65</sup>

### 3b. MH Mortality

#### Rates.

**Literature Search and North American Malignant Hyperthermia Registry Database Search.** There are three Oxford Center for Evidence-based Medicine level 3 studies of MH mortality derived from the North American Malignant Hyperthermia Registry, with one having an overlapping dataset. Mortality rates ranged from 1.4 to 9.5% in predominantly U.S. cases.<sup>10,65,66</sup> There are also unpublished North American Malignant Hyperthermia Registry deaths (3/75) from 2013 through 2016. For years 1987 through 2016, a total of 15 ( $n = 450$  MH events) deaths were reported to the North American Malignant Hyperthermia Registry. Four of 15 MH-triggering anesthetics were administered in freestanding facilities. North American Malignant Hyperthermia Registry studies were limited by possible selection bias, reporting, and recall bias. We also identified four International Classification of Diseases, Ninth Revision–based MH studies reporting 4.6 to 11.7% mortality rates. As claims data do not differentiate between MH events and

MH-susceptible individuals, these probably represent overestimates for U.S. populations (Supplemental Digital Content 8, <http://links.lww.com/ALN/B805>).<sup>67–70</sup>

### Relationship to Dantrolene.

**Literature Search.** One study demonstrated that timely dantrolene administration (less than or equal to 6 h after initial MH sign) decreased mortality from 75 to 0%. This was a highly significant result in a small, unblinded prospective study that provided evidence for U.S. Food and Drug Administration approval of iv dantrolene to treat MH.<sup>3</sup> Subsequent retrospective North American Malignant Hyperthermia Registry studies (1987 through 2012) showed that initial dantrolene (mg/kg) doses did not differ between those who died of MH and those who did not. The time intervals between first MH sign and first dantrolene administration also did not differ, but low patient death rates resulted in low power (18%) to detect a difference. In a North American Malignant Hyperthermia Registry study with eight cardiac arrests and four deaths, total dantrolene dose was higher in those who arrested or died compared with those who did not (10 *vs.* 5 mg/kg).<sup>10,66</sup> All five references are Oxford Center for Evidence-based Medicine levels 3 and 4 (Supplemental Digital Content 9, <http://links.lww.com/ALN/B806>).<sup>9,65</sup>

## Discussion

Providers use succinylcholine in modern anesthetic practice. Overall, 16% ( $n = 1,035,413$ ) of Multicenter Perioperative Outcomes Group cases included succinylcholine; 4% ( $n = 246,904$ ) included succinylcholine without volatile anesthetic agents. The black box warning against routine pediatric succinylcholine use may be partially responsible for its low frequency of use in pediatric institutions.<sup>71</sup>

In the setting of difficult (grades III/IV) mask ventilation, providers use succinylcholine. Thirty-four percent ( $n = 20,175$ ) of Multicenter Perioperative Outcomes Group cases with grades III/IV mask ventilation received succinylcholine. In freestanding ambulatory surgery centers, 37% ( $n = 509$ ) of cases with grades III/IV mask ventilation received succinylcholine. In 20 non-office-based institutions, a median dose of 1.2 mg/kg (first quartile, 0.97 mg/kg) succinylcholine was administered to 560 cases with grade IV mask ventilation.

Our study identified 24 MH events triggered by succinylcholine (0.5 to 2.5 mg/kg) without concomitant volatile anesthetics, 21 in the United States or Canada. At least 13 MH cases received clinically indicated dantrolene. Although 14 patients experienced MH complications and 1 patient died, because of the small sample size and biased reporting, we could not reliably estimate morbidity/mortality rates for these cases.



Our study revealed that time of dantrolene administration but not dose affected the likelihood of an MH complication (pulmonary edema, disseminated intravascular coagulation, and heart, liver, kidney, and brain dysfunction). Complications increased substantially with every 10-min delay in initiating dantrolene treatment. Likelihood of an MH complication increased 1.6 times for every 30-min increase in time between first MH sign and first dantrolene dose. If clinicians waited more than 50 min, complications increased to 100%. Because of low-powered studies, we do not know whether the dose or amount of dantrolene administered affects mortality. We found that MH killed at least 15 U.S. patients, four of whom received MH-triggering anesthetics in a freestanding facility.

## Limitations

The Multicenter Perioperative Outcomes Group database, though large and capable of supporting population-based epidemiologic research, draws cases predominantly from the United States (4.3% of cases came from The Netherlands) and lacks Canadian cases. Many Multicenter Perioperative Outcomes Group-reporting institutions are teaching hospitals; few are office-based practices. The database does not inform us about succinylcholine use when non-anesthesiology department members administer the sedation/anesthetic or rescue the airway. Therefore, the succinylcholine use rate in private practice and office-based practices and by non-anesthesiology-affiliated individuals may differ from what we report. Because the Society for Ambulatory Anesthesia closed its Clinical Outcomes Registry, it may become more difficult to research future office-based practices.

While the Multicenter Perioperative Outcomes Group database facilitates large-scale retrospective analyses, manual review of 6 million charts to determine exact incidence of airway rescue was not possible. We chose to use grades III/IV mask ventilation as a surrogate. By excluding cases where ease of mask ventilation was not documented, we may have introduced bias in favor of higher grades. We do not know how well succinylcholine use rate for difficult mask ventilation approximates airway rescue use. Further, we cannot determine the proportion of cases where succinylcholine was administered *after* difficulty with mask ventilation was encountered.

Selection bias, selective reporting, and recall bias affect reporting to the North American Malignant Hyperthermia Registry. All MH deaths in the North American Malignant Hyperthermia Registry studies were defined clinically according to the MH clinical grading scale with diagnosis confirmed in some by MH causative mutation identification. Though informative, the Anesthesia Closed Claims Project does not capture all adverse anesthetic events and may not include the anesthesia record. We do

not know succinylcholine doses for MH events reported to the North American Malignant Hyperthermia Registry and Closed Claims Project. Unreliable denominators render North American Malignant Hyperthermia Registry and Closed Claims data insufficient for population-based epidemiologic research.

The Food and Drug Administration approved sugammadex in December 2015. The Anesthesia Closed Claims Project does not currently contain cases since sugammadex release. Although we analyzed 2016 cases from both the North American Malignant Hyperthermia Registry and Multicenter Perioperative Outcomes Group databases, future succinylcholine use may change as clinicians become more accustomed to sugammadex.

Our systematic literature review analyzed predominantly Oxford Center for Evidence-based Medicine Class 3 and 4 studies, which were too few in number/query to support quantitative synthesis. Selection bias, selective reporting, and recall bias affected most of these investigations. We did not perform a cost-effectiveness study, but dantrolene's cost effectiveness in ambulatory surgery centers has been previously reported.<sup>72</sup> Given our new data, investigators may wish to pursue additional cost-benefit analyses, although MH incidence is still difficult to determine.<sup>67,73,74</sup>

## Conclusions

This study presents evidence that succinylcholine is used frequently in many anesthetizing and sedating locations, including for cases in which difficult mask ventilation is encountered. Succinylcholine administered without volatile anesthetics triggers MH events that warranted dantrolene treatment. In the United States and Canada, MH still causes mortality and major morbidity. Delays in dantrolene treatment markedly increased the likelihood of MH complications. Our data support stocking dantrolene wherever succinylcholine or volatile anesthetics may be used.

## Acknowledgments

The authors thank the contributing institutions and investigators of the Multicenter Perioperative Outcomes Group (Ann Arbor, Michigan) for access to their database (appendix 1). The authors are grateful to Karen L. Posner, Ph.D., and Karen B. Domino, M.D., of the Anesthesia Closed Claims Advisory Committee, University of Washington, Seattle, Washington, for their assistance in searching the database of the Anesthesia Closed Claims Project of the Anesthesia Quality Institute (Schaumburg, Illinois). The authors thank Richard Henker, Ph.D., R.N., C.R.N.A., F.A.A.N., Department of Nurse Anesthesia, School of Nursing, University of Pittsburgh, Pittsburgh, Pennsylvania, for serving as principal investigator of the University of

Pittsburgh Institutional Review Board–approved protocol for the report of mortality in the data of the North American Malignant Hyperthermia Registry of the Malignant Hyperthermia Association of the United States. The authors are grateful to Michael C. Young, M.S., Database Manager (2000 through 2017) of the North American Malignant Hyperthermia Registry of the Malignant Hyperthermia Association of the United States, for his response to our data queries. The authors thank Amy M. Gunnett, R.N., C.C.R.C., Database Manager (2018) of the North American Malignant Hyperthermia Registry of the Malignant Hyperthermia Association of the United States, for her assistance. The authors appreciate the advice of Henry Rosenberg, M.D., C.P.E., President of the Malignant Hyperthermia Association of the United States, Sherburne, New York. The authors thank Daniel B. Larach, M.D., M.T.R., M.A., Department of Anesthesiology, Weill Cornell Medical College and New York–Presbyterian Hospital, New York, New York, for his helpful critique.

## Research Support

Support for underlying electronic health record data collection by the Multicenter Perioperative Outcomes Group (Ann Arbor, Michigan) was provided, in part, by Blue Cross and Blue Shield of Michigan (BCBSM; Detroit, Michigan) and Blue Care Network (Southfield, Michigan) as part of the BCBSM Value Partnerships program for contributing hospitals in the State of Michigan. Although BCBSM and Multicenter Perioperative Outcomes Group work collaboratively, the opinions, beliefs, and viewpoints expressed by the authors do not necessarily reflect the opinions, beliefs, and viewpoints of BCBSM or any of its employees. Although the Multicenter Perioperative Outcomes Group has collaborated in the authorship of this manuscript by providing data and statistical analysis, the opinions, beliefs, and viewpoints expressed by the authors of this manuscript do not necessarily reflect the opinions, beliefs, and viewpoints of the Multicenter Perioperative Outcomes Group. Support of the Anesthesia Closed Claims Project of the Anesthesia Quality Institute is provided, in part, by the American Society of Anesthesiologists (Schaumburg, Illinois). The North American Malignant Hyperthermia Registry (Gainesville, Florida), founded in 1987, became a wholly owned subsidiary of the Malignant Hyperthermia Association of the United States (Sherburne, New York) in 1995. North American Malignant Hyperthermia Registry administrative staff members have received salary support from the Malignant Hyperthermia Association of the United States. North American Malignant Hyperthermia Registry directors have never received financial support from the Malignant Hyperthermia Association of the United States. The opinions, beliefs, and viewpoints expressed by the authors of this manuscript do not necessarily reflect the opinions, beliefs, and viewpoints of the

Malignant Hyperthermia Association of the United States. Apart from the above, only institutional or departmental sources supported the creation of this manuscript.

## Competing Interests

Many of the authors are unpaid volunteers for the non-profit Malignant Hyperthermia Association of the United States (Sherburne, New York). They have served variously as directors of the North American Malignant Hyperthermia Registry of Malignant Hyperthermia Association of the United States and members of the board of Malignant Hyperthermia Association of the United States, the Professional Advisory Council of Malignant Hyperthermia Association of the United States, or the Malignant Hyperthermia Hotline of Malignant Hyperthermia Association of the United States. All of these positions are voluntary and unpaid. Many participated in the drafting of the current Malignant Hyperthermia Association of the United States recommendation for dantrolene availability in anesthetizing locations. Many of the authors have traveled to MH conferences in the United States or Canada with Malignant Hyperthermia Association of the United States financial support. The Malignant Hyperthermia Association of the United States receives funding support from Malignant Hyperthermia Association of the United States members, customers, medical associations and societies, foundations, and various corporations including Eagle Pharmaceuticals (Woodcliff Lake, New Jersey), PAR Pharmaceutical (Chestnut Ridge, New York), and U.S. WorldMeds LLC (Louisville, Kentucky). Dr. Capacchione has received a consulting fee from Eagle Pharmaceuticals, Inc. Dr. Mashman has received a grant from Eagle Pharmaceuticals, Inc., for three vials of Ryanodex to bring on a medical mission trip. Dr. Riazi has received a consulting fee from Norgine Pharmaceuticals (Amsterdam, The Netherlands) and is also a member of the scientific advisory board of the RYR1 Foundation (Pittsburgh, Pennsylvania). Dr. Sivak has been a principal investigator for a Merck (Kenilworth, New Jersey)–sponsored study of sugammadex (November 7, 2017 through August 3, 2018). The remaining authors declare no competing interests.

## Correspondence

Address correspondence to Dr. Larach: The North American Malignant Hyperthermia Registry of Malignant Hyperthermia Association of the United States at the Department of Anesthesiology, University of Florida College of Medicine, P.O. Box 100254, Gainesville, Florida 32610-0254. mlarach@gmail.com. Information on purchasing reprints may be found at [www.anesthesiology.org](http://www.anesthesiology.org) or on the masthead page at the beginning of this issue. ANESTHESIOLOGY's articles are made freely accessible to all readers, for personal use only, 6 months from the cover date of the issue.

## References

- Hopkins PM: Malignant hyperthermia: Pharmacology of triggering. *Br J Anaesth* 2011; 107:48–56
- Snyder HR Jr, Davis CS, Bickerton RK, Halliday RP: 1-[(5-arylfurfurylidene)amino]hydantoin: A new class of muscle relaxants. *J Med Chem* 1967; 10:807–10
- Kolb ME, Horne ML, Martz R: Dantrolene in human malignant hyperthermia: A multicenter study. *ANESTHESIOLOGY* 1982; 56:254–62
- Dantrolene sodium approved for malignant hyperthermia. *FDA Drug Bull* 1979; 9:27
- Frequently asked questions: Dantrolene. Available at: <http://www.mhaus.org>. Accessed February 11, 2018
- Emergency treatment for an acute MH event. Available at: <http://www.mhaus.org>. Accessed March 6, 2017
- AAAASF Surgical Version 14, 500.23.40, 500.23.45, 500.23.5. Available at: <https://www.aaaasf.org>. Accessed March 3, 2018
- Joshi GP, Desai MS, Gayer S, Vila H Jr; Society for Ambulatory Anesthesia (SAMBA): Succinylcholine for emergency airway rescue in class B ambulatory facilities: The Society for Ambulatory Anesthesia position statement. *Anesth Analg* 2017; 124:1447–9
- Larach MG, Gronert GA, Allen GC, Brandom BW, Lehman EB: Clinical presentation, treatment, and complications of malignant hyperthermia in North America from 1987 to 2006. *Anesth Analg* 2010; 110:498–507
- Larach MG, Brandom BW, Allen GC, Gronert GA, Lehman EB: Malignant hyperthermia deaths related to inadequate temperature monitoring, 2007–2012: A report from the North American malignant hyperthermia registry of the malignant hyperthermia association of the United States. *Anesth Analg* 2014; 119:1359–66
- Larach MG: A primer for diagnosing and managing malignant hyperthermia susceptibility. *ANESTHESIOLOGY* 2018; 128:8–10
- Available at: <http://www.isobsurgery.org>. Accessed February 4, 2018
- Available at: [http://www.cpso.on.ca/cpso/media/uploadedfiles/members/program-update\\_nov2011.pdf](http://www.cpso.on.ca/cpso/media/uploadedfiles/members/program-update_nov2011.pdf). Accessed March 29, 2018
- Massachusetts Board of Dentistry 234 CMR 6.04. 6.04: Facility Permit D–A: Facility requirements for the administration of general anesthesia and deep sedation
- Tennessee Comp. R. & Regs. 0880–02–.21, 1050–02–.21, (Office Based Surgery) 1200–08–10–.06 (Basic Services)
- Kheterpal S: Clinical research using an information system: The multicenter perioperative outcomes group. *Anesthesiol Clin* 2011; 29:377–88
- Freundlich RE, Kheterpal S: Perioperative effectiveness research using large databases. *Best Pract Res Clin Anaesthesiol* 2011; 25:489–98
- Han R, Tremper KK, Kheterpal S, O'Reilly M: Grading scale for mask ventilation. *ANESTHESIOLOGY* 2004; 101:267
- Larach MG, Localio AR, Allen GC, Denborough MA, Ellis FR, Gronert GA, Kaplan RF, Muldoon SM, Nelson TE, Ørding H, Rosenberg H, Waud BE, Wedel DJ: A clinical grading scale to predict malignant hyperthermia susceptibility. *ANESTHESIOLOGY* 1994; 80:771–9
- Available at: <http://www.prisma-statement.org>. Accessed April 23, 2017
- Available at: <http://www.cebm.net/wp-content/uploads/2014/06/CEBM-Levels-of-Evidence-2.1.pdf>. Accessed April 30, 2017
- Table 8.5a from Handbook version 5.10. Available at: [http://www.handbook.cochrane.org/chapter\\_8](http://www.handbook.cochrane.org/chapter_8). Accessed April 30, 2017
- Zed PJ, Abu-Laban RB, Harrison DW: Intubating conditions and hemodynamic effects of etomidate for rapid sequence intubation in the emergency department: An observational cohort study. *Acad Emerg Med* 2006; 13:378–83
- Aldrete JA, Daniel W, O'Higgins JW, Homatas J, Starzl TE: Analysis of anesthetic-related morbidity in human recipients of renal homografts. *Anesth Analg* 1971; 50:321–9
- Lazzell VA, Carr AS, Lerman J, Burrows FA, Creighton RE: The incidence of masseter muscle rigidity after succinylcholine in infants and children. *Can J Anaesth* 1994; 41:475–9
- Istvan J, Belliveau M, Donati F: Rapid sequence induction for appendectomies: A retrospective case-review analysis. *Can J Anaesth* 2010; 57:330–6
- Riazi S, Larach MG, Hu C, Wijeyesundera D, Massey C, Kraeva N: Malignant hyperthermia in Canada: Characteristics of index anesthetics in 129 malignant hyperthermia susceptible probands. *Anesth Analg* 2014; 118:381–7
- West JR, Lott C, Donner L, Kanter M, Caputo ND: Peri-intubation factors affecting emergency physician choice of paralytic agent for rapid sequence intubation of trauma patients. *Am J Emerg Med* 2018; 36:1151–4
- Patanwala AE, Erstad BL, Roe DJ, Sakles JC: Succinylcholine is associated with increased mortality when used for rapid sequence intubation of severely brain injured patients in the emergency department. *Pharmacotherapy* 2016; 36:57–63
- Patanwala AE, Sakles JC: Effect of patient weight on first pass success and neuromuscular blocking agent dosing for rapid sequence intubation in the emergency department. *Emerg Med J* 2017; 34:739–43
- Tarquinio KM, Howell JD, Montgomery V, Turner DA, Hsing DD, Parker MM, Brown CA 3<sup>rd</sup>, Walls RM, Nadkarni VM, Nishisaki A; National Emergency Airway Registry for Children; Pediatric Acute Lung Injury and Sepsis Investigators Network: Current medication practice and tracheal intubation safety

- outcomes from a prospective multicenter observational cohort study. *Pediatr Crit Care Med* 2015; 16:210–8
32. Dexter F, Epstein RH, Wachtel RE, Rosenberg H: Estimate of the relative risk of succinylcholine for triggering malignant hyperthermia. *Anesth Analg* 2013; 116:118–22
  33. Lemyre B, Cheng R, Gaboury I: Atropine, fentanyl and succinylcholine for non-urgent intubations in newborns. *Arch Dis Child Fetal Neonatal Ed* 2009; 94:F439–42
  34. Dufour DG, Larose DL, Clement SC: Rapid sequence intubation in the emergency department. *J Emerg Med* 1995; 13:705–10
  35. Trépanier CA, Brousseau C, Lacerte L: Myalgia in outpatient surgery: Comparison of atracurium and succinylcholine. *Can J Anaesth* 1988; 35(3 pt 1):255–8
  36. Mikat-Stevens M, Sukhani R, Pappas AL, Fluder E, Kleinman B, Stevens RA: Is succinylcholine after pretreatment with d-tubocurarine and lidocaine contraindicated for outpatient anesthesia? *Anesth Analg* 2000; 91:312–6
  37. Tang J, Joshi GP, White PF: Comparison of rocuronium and mivacurium to succinylcholine during outpatient laparoscopic surgery. *Anesth Analg* 1996; 82:994–8
  38. Goldberg ME, Larijani GE, Azad SS, Sosis M, Seltzer JL, Ascher J, Weakly JN: Comparison of tracheal intubating conditions and neuromuscular blocking profiles after intubating doses of mivacurium chloride or succinylcholine in surgical outpatients. *Anesth Analg* 1989; 69:93–9
  39. Poler SM, Watcha MF, White PF: Mivacurium as an alternative to succinylcholine during outpatient laparoscopy. *J Clin Anesth* 1992; 4:127–33
  40. Luyk NH, Weaver JM, Quinn C, Wilson S, Beck FM: Comparative trial of succinylcholine vs low dose atracurium-lidocaine combination for intubation in short outpatient procedures. *Anesth Prog* 1990; 37:238–43
  41. Gravningsbråten R, Nicklasson B, Raeder J: Safety of laryngeal mask airway and short-stay practice in office-based adenotonsillectomy. *Acta Anaesthesiol Scand* 2009; 53:218–22
  42. Burgoyne LL, Anghelescu DL: Intervention steps for treating laryngospasm in pediatric patients. *Paediatr Anaesth* 2008; 18:297–302
  43. Visvanathan T, Kluger MT, Webb RK, Westhorpe RN: Crisis management during anaesthesia: Laryngospasm. *Qual Saf Health Care* 2005; 14:e3
  44. Chung DC, Rowbottom SJ: A very small dose of suxamethonium relieves laryngospasm. *Anaesthesia* 1993; 48:229–30
  45. Sheta SA, Abdelhalim AA, Nada E: Evaluation of “no touch” extubation technique on airway-related complications during emergence from general anesthesia. *Saudi J Anaesth* 2011; 5:125–31
  46. Al-Metwalli RR, Mowafi HA, Ismail SA: Gentle chest compression relieves extubation laryngospasm in children. *J Anesth* 2010; 24:854–7
  47. Khatiwada S, Bhattarai B, Pokharel K, Subedi A: Adverse events in children receiving general anaesthesia with laryngeal mask airway insertion. *JNMA J Nepal Med Assoc* 2015; 53:77–82
  48. Ranieri D Jr, Neubauer AG, Ranieri DM, do Nascimento P Jr: The use of disposable laryngeal mask airway for adenotonsillectomies. *Rev Bras Anesthesiol* 2012; 62:788–97
  49. Savran-Karadeniz M, Oguz BH, Orhan-Sungur M, Erginel B, Gun-Soysal F, Tugrul M, Ozkan-Seyhan T: Does magnesium sulfate affect the incidence of respiratory complications in children undergoing esophageal dilatation? An observational pilot study. *J Intensive Care Emerg Med* 2016; 12:91–5
  50. Batra YK, Ivanova M, Ali SS, Shamsah M, Al Qattan AR, Belani KG: The efficacy of a subhypnotic dose of propofol in preventing laryngospasm following tonsillectomy and adenoidectomy in children. *Paediatr Anaesth* 2005; 15:1094–7
  51. Sengupta J, Sengupta M, Nag T: Agents for facilitation of laryngeal mask airway insertion: A comparative study between thiopentone sodium and propofol. *Ann Afr Med* 2014; 13:124–9
  52. Annigeri RV, Patil RS: A retrospective analysis on anesthetic management during rigid bronchoscopy in children with foreign body aspiration: Propofol and sevoflurane with controlled ventilation. *Anesth Essays Res* 2017; 11:871–4
  53. Orestes MI, Lander L, Verghese S, Shah RK: Incidence of laryngospasm and bronchospasm in pediatric adenotonsillectomy. *Laryngoscope* 2012; 122:425–8
  54. Afshan G, Chohan U, Qamar-Ul-Hoda M, Kamal RS: Is there a role of a small dose of propofol in the treatment of laryngeal spasm? *Paediatr Anaesth* 2002; 12:625–8
  55. Hung CW, Licina L, Abramson DH, Arslan-Carlson V: Anesthetic complications during general anesthesia without intravenous access in pediatric ophthalmologic clinic: Assessment of 5216 cases. *Minerva Anesthesiol* 2017; 83:712–9
  56. Drake-Brockman TF, Ramgolam A, Zhang G, Hall GL, von Ungern-Sternberg BS: The effect of endotracheal tubes versus laryngeal mask airways on perioperative respiratory adverse events in infants: A randomised controlled trial. *Lancet* 2017; 389:701–8
  57. Lalwani K, Richins S, Aliason I, Milczuk H, Fu R: The laryngeal mask airway for pediatric adenotonsillectomy: Predictors of failure and complications. *Int J Pediatr Otorhinolaryngol* 2013; 77:25–8
  58. Bhananker SM, Ramamoorthy C, Geiduschek JM, Posner KL, Domino KB, Haberkern CM, Campos JS, Morray JP: Anesthesia-related cardiac arrest in children: Update from the Pediatric Perioperative Cardiac Arrest Registry. *Anesth Analg* 2007; 105:344–50
  59. Visoiu M, Young MC, Wieland K, Brandom BW: Anesthetic drugs and onset of malignant hyperthermia. *Anesth Analg* 2014; 118:388–96
  60. Klingler W, Heiderich S, Girard T, Gravino E, Heffron JJ, Johannsen S, Jurkat-Rott K, Rüffert H, Schuster F



- Snoeck M, Sorrentino V, Tegazzin V, Lehmann-Horn F: Functional and genetic characterization of clinical malignant hyperthermia crises: A multi-centre study. *Orphanet J Rare Dis* 2014; 9:8
61. Schuster F, Johannsen S, Schneiderbanger D, Roewer N: Evaluation of suspected malignant hyperthermia events during anesthesia. *BMC Anesthesiol* 2013; 13:24
  62. Pulnitiporn A, Charuluxananan S, Inphum P, Kitsampanwong W: Malignant hyperthermia: A case report in Thai Anesthesia Incidents Study (THAI Study). *J Med Assoc Thai* 2005; 88 Suppl 7:S149–52
  63. Lazarus A, Rosenberg H: Malignant hyperthermia during ECT. *Am J Psychiatry* 1991; 148:541–2
  64. Burkman JM, Posner KL, Domino KB: Analysis of the clinical variables associated with recrudescence after malignant hyperthermia reactions. *ANESTHESIOLOGY* 2007; 106:901–6
  65. Nelson P, Litman RS: Malignant hyperthermia in children: An analysis of the North American malignant hyperthermia registry. *Anesth Analg* 2014; 118:369–74
  66. Larach MG, Brandom BW, Allen GC, Gronert GA, Lehman EB: Cardiac arrests and deaths associated with malignant hyperthermia in North America from 1987 to 2006: A report from the North American malignant hyperthermia registry of the malignant hyperthermia association of the United States. *ANESTHESIOLOGY* 2008; 108:603–11
  67. Lu Z, Rosenberg H, Li G: Prevalence of malignant hyperthermia diagnosis in hospital discharge records in California, Florida, New York, and Wisconsin. *J Clin Anesth* 2017; 39:10–4
  68. Salazar JH, Yang J, Shen L, Abdullah F, Kim TW: Pediatric malignant hyperthermia: risk factors, morbidity, and mortality identified from the Nationwide Inpatient Sample and Kids' Inpatient Database. *Paediatr Anaesth* 2014; 24:1212–6
  69. Li G, Brady JE, Rosenberg H, Sun LS: Excess comorbidities associated with malignant hyperthermia diagnosis in pediatric hospital discharge records. *Paediatr Anaesth* 2011; 21:958–63
  70. Rosero EB, Adesanya AO, Timaran CH, Joshi GP: Trends and outcomes of malignant hyperthermia in the United States, 2000 to 2005. *ANESTHESIOLOGY* 2009; 110:89–94
  71. Anectine® (Succinylcholine Chloride Injection, USP) black box warning, Risk of cardiac arrest from hyperkalemic rhabdomyolysis Reference ID: 2867696. Available at: <http://www.accessdata.fda.gov>. Accessed February 23, 2018
  72. Aderibigbe T, Lang BH, Rosenberg H, Chen Q, Li G: Cost-effectiveness analysis of stocking dantrolene in ambulatory surgery centers for the treatment of malignant hyperthermia. *ANESTHESIOLOGY* 2014; 120:1333–8
  73. Ho PT, Carvalho B, Sun EC, Macario A, Riley ET: Cost-benefit analysis of maintaining a fully stocked malignant hyperthermia cart *versus* an initial dantrolene treatment dose for maternity units. *ANESTHESIOLOGY* 2018; 129:249–59
  74. Wong CA: Dantrolene and malignant hyperthermia carts: Do we need them on maternity units? *ANESTHESIOLOGY* 2018; 129:225–7

## Appendix 1: Multicenter Perioperative Outcomes Group Investigators and Affiliated Institutions

The authors gratefully acknowledge the valuable contributions to protocol and final manuscript review by the Multicenter Perioperative Outcomes Group Perioperative Clinical Research Committee:

- Fabian Kooij, M.D. — Department of Anesthesiology, Academic Medical Center, Amsterdam, The Netherlands
- Janet Wilczak, M.D. — Beaumont Health, Dearborn, Michigan
- Roy Soto, M.D. — Beaumont Health, Royal Oak, Michigan
- Joshua Berris, D.O. — Beaumont Health, Farmington Hills, Michigan
- Zachary Price, M.D. — Beaumont Health, Grosse Pointe, Michigan
- Steven Lins, M.D. — Bronson Healthcare, Battle Creek, Michigan
- Peter Coles, M.D. — Bronson Healthcare, Kalamazoo, Michigan
- John M. Harris, M.D. — CHOC Children's Hospital, Orange, California
- Kenneth C. Cummings III, M.D., M.S. — Anesthesiology Institute, Cleveland Clinic, Cleveland, Ohio
- Mitchell F. Berman, M.D. — Department of Anesthesiology, Columbia University Medical Center, New York, New York
- Masakatsu Nanamori, M.D. — Henry Ford Health System, Detroit, Michigan
- Bruce T. Adelman, M.D. — Henry Ford Health System, West Bloomfield, Michigan
- Christopher Wedeven, M.D. — Holland Hospital, Holland, Michigan
- John LaGorio, M.D. — Mercy Health, Muskegon, Michigan
- Patrick J. McCormick, M.D., M.Eng. — Department of Anesthesiology and Critical Care Medicine, Memorial Sloan Kettering Cancer Center, New York, New York
- Simon Tom, M.D. — Department of Anesthesiology, Perioperative Care, and Pain Medicine, New York University Langone Medical Center, New York, New York
- Michael F. Aziz, M.D. — Department of Anesthesiology & Perioperative Medicine, Oregon Health & Science University, Portland, Oregon
- Traci Coffman, M.D. — St. Joseph Mercy, Ann Arbor, Michigan
- Terri A. Ellis II, M.D. — St. Joseph Mercy Oakland, Pontiac, Michigan
- Susan Molina, M.D. — St. Mary Mercy Hospital, Livonia, Michigan
- William Peterson, M.D. — Sparrow Health System, Lansing, Michigan
- Sean C. Mackey, M.D., Ph.D. — Department of Anesthesiology, Perioperative and Pain Medicine, Stanford University School of Medicine, Stanford, California

Wilton A. van Klei, M.D., Ph.D. — Department of Anesthesiology, University Medical Center Utrecht, Utrecht, The Netherlands

Adit A. Ginde, M.D., M.P.H. — Department of Anesthesiology, University of Colorado, Aurora, Colorado

Daniel A. Biggs, M.D., M.Sc. — Department of Anesthesiology, University of Oklahoma Health Sciences Center, Oklahoma City, Oklahoma

Mark D. Neuman, M.D., M.Sc. — Department of Anesthesiology, University of Pennsylvania, Philadelphia, Pennsylvania

Robert M. Craft, M.D. — Department of Anesthesiology, University of Tennessee Medical Center, Knoxville, Tennessee

Nathan L. Pace, M.D., M.Stat. — Department of Anesthesiology, University of Utah, Salt Lake City, Utah

William C. Paganelli, M.D., Ph.D. — Department of Anesthesiology, University of Vermont, Larner College of Medicine, Burlington, Vermont

Marcel E. Durieux, M.D., Ph.D. — Department of Anesthesiology, University of Virginia, Charlottesville, Virginia

Bala J. Nair, Ph.D. — Department of Anesthesiology and Pain Medicine, University of Washington, Seattle, Washington

Jonathan P. Wanderer, M.D. — Department of Anesthesiology, Vanderbilt University Medical Center, Nashville, Tennessee

Scott A. Miller, M.D. — Department of Anesthesiology, Wake Forest Baptist Health, Winston-Salem, North Carolina

Daniel L. Helsten, M.D. — Department of Anesthesiology, Washington University School of Medicine, St. Louis, Missouri

Zachary A. Turnbull, M.D. — Department of Anesthesiology, Weill Cornell Medical College, New York, New York

Robert B. Schonberger, M.D., M.H.S. — Department of Anesthesiology, Yale School of Medicine, New Haven, Connecticut

## Appendix 2: Systematic Literature Review Queries and Key Words

### Queries

1. What is the frequency of succinylcholine administration in hospital-based operating suites (including delivery suites), intensive care units, and emergency departments? What is the frequency of succinylcholine administration without volatile anesthetics in hospital-based operating suites (including delivery suites)?
2. What is the frequency of succinylcholine administration in procedural suites (e.g., radiology, electroconvulsive therapy)? What is the frequency of succinylcholine administration without volatile anesthetics in hospital-based off-site locations?
3. What is the frequency of succinylcholine administration in ambulatory surgery centers? What is the frequency of succinylcholine administration without concomitant volatile anesthetic administration in ambulatory surgery centers?
4. What is the frequency of succinylcholine administration in medical, oral surgical, and dental offices that sedate/anesthetize patients?
5. How often is succinylcholine administered in perioperative and procedural settings for airway rescue? What is the utilization rate of succinylcholine in anesthetics with evidence of difficulty with mask ventilation (grade III or IV)? What is the utilization rate of succinylcholine for rescue of grade IV mask ventilation? During manuscript preparation, an additional analysis was performed to determine succinylcholine dosage for cases with documented grade IV mask ventilation. What is the incidence of succinylcholine rescue of difficulty with mask ventilation in patients who are 0 to <10 yr old *versus* those who are 10 yr to 18 yr old?
6. Does administration of succinylcholine without concomitant volatile anesthetic administration trigger malignant hyperthermia (MH)? During manuscript revision, an additional analysis was performed to determine whether dantrolene administration was warranted in these cases and whether they had associated MH morbidity and mortality.
7. What is the MH mortality rate in the United States and Canada?
8. What is the impact of dantrolene administration on MH mortality in the United States and Canada? Does time or initial dantrolene dosage affect likelihood of MH mortality?
9. What morbidities are associated with an acute MH event in the United States and Canada?
10. What is the MH morbidity rate in the United States and Canada?
11. What is the impact of dantrolene administration on MH morbidity in the United States and Canada? Does time or initial dantrolene dose affect likelihood of MH mortality?

### Key Words with Combinations

**Airway rescue:** ambulatory surgery anesthetics, drugs, laryngospasm, medications, succinylcholine

**Adverse events:** surgery, medications, succinylcholine

**Ambulatory surgery:** adverse events, anesthetics, medications, sedation, succinylcholine

**Cesarean section:** dantrolene (initial dose/administration time), general anesthesia, succinylcholine

**Dental or oral:** adverse events dental or oral surgical anesthetic, drugs, medications, succinylcholine, surgical sedation

**Electroconvulsive treatment:** adverse events, anesthetic treatment, sedation, succinylcholine

**Emergency department:** adverse events, drugs, medications, sedation, tracheal intubation

**Intensive care:** drugs, medications, succinylcholine, tracheal intubations

**Malignant hyperthermia:** anesthetic triggers, dantrolene, epidemiology, mortality rate, morbidity rate, succinylcholine

**Maternal:** anesthetic, dantrolene, morbidity, mortality, treatment

**Radiologic procedure:** adverse events, anesthetic adverse events, malignant hyperthermia, sedation
